# Supplementary material for: Dermestes maculatus: an intermediate-germ beetle model system for evo-devo
Source: PubMed Central journal article supplement (PMC4609124; doi:10.1186/s13227-015-0028-0), 2015-10-16
Supplement: 13227_2015_28_MOESM5_ESM.pdf [file 13227_2015_28_MOESM5_ESM.pdf]

|                      | 25 °C                                                                                               | 30 °C                                                                          |
|----------------------|-----------------------------------------------------------------------------------------------------|--------------------------------------------------------------------------------|
| <b>0-2 hr AEL</b>    | Male and female pronuclei fuse                                                                      | Male and female pronuclei fuse, zygotic nuclei divide in the center of the egg |
| <b>2-4 hr AEL</b>    | Zygotic nuclei divide in the center                                                                 | Most nuclei migrate toward the egg periphery, a syncytial blastoderm forms     |
| <b>4-6 hr AEL</b>    | Zygotic nuclei divide and gradually distribute along the embryo                                     | Cellular blastoderm forms, gastrulation starts                                 |
| <b>6-8 hr AEL</b>    | Most nuclei migrate toward the egg periphery, a syncytial blastoderm forms                          | Gastrulation completes, germband extension begins                              |
| <b>8-10 hr AEL</b>   | Cellular membrane form between individual embryos, a cellular blastoderm forms, gastrulation starts | Serosal window closes, germband extends dorsally                               |
| <b>10-12 hr AEL</b>  | Gastrulation proceeds, an early germ band with an open serosal window is established                |                                                                                |
| <b>12-14 hr AEL</b>  | Germ band extends, head segmental furrows become visible                                            |                                                                                |
| <b>14-16 hr AEL</b>  | Germ band extends dorsally, thoracic segmental furrows become visible                               |                                                                                |
| <b>16- 18 hr AEL</b> | Germ band is fully extended, abdominal segments become obvious, appendage buds form                 |                                                                                |
